# Supplementary material
Source: MDPI journal article supplement (https://www.mdpi.com/2306-5710/9/2/38)
Supplement: s1 [file s1]

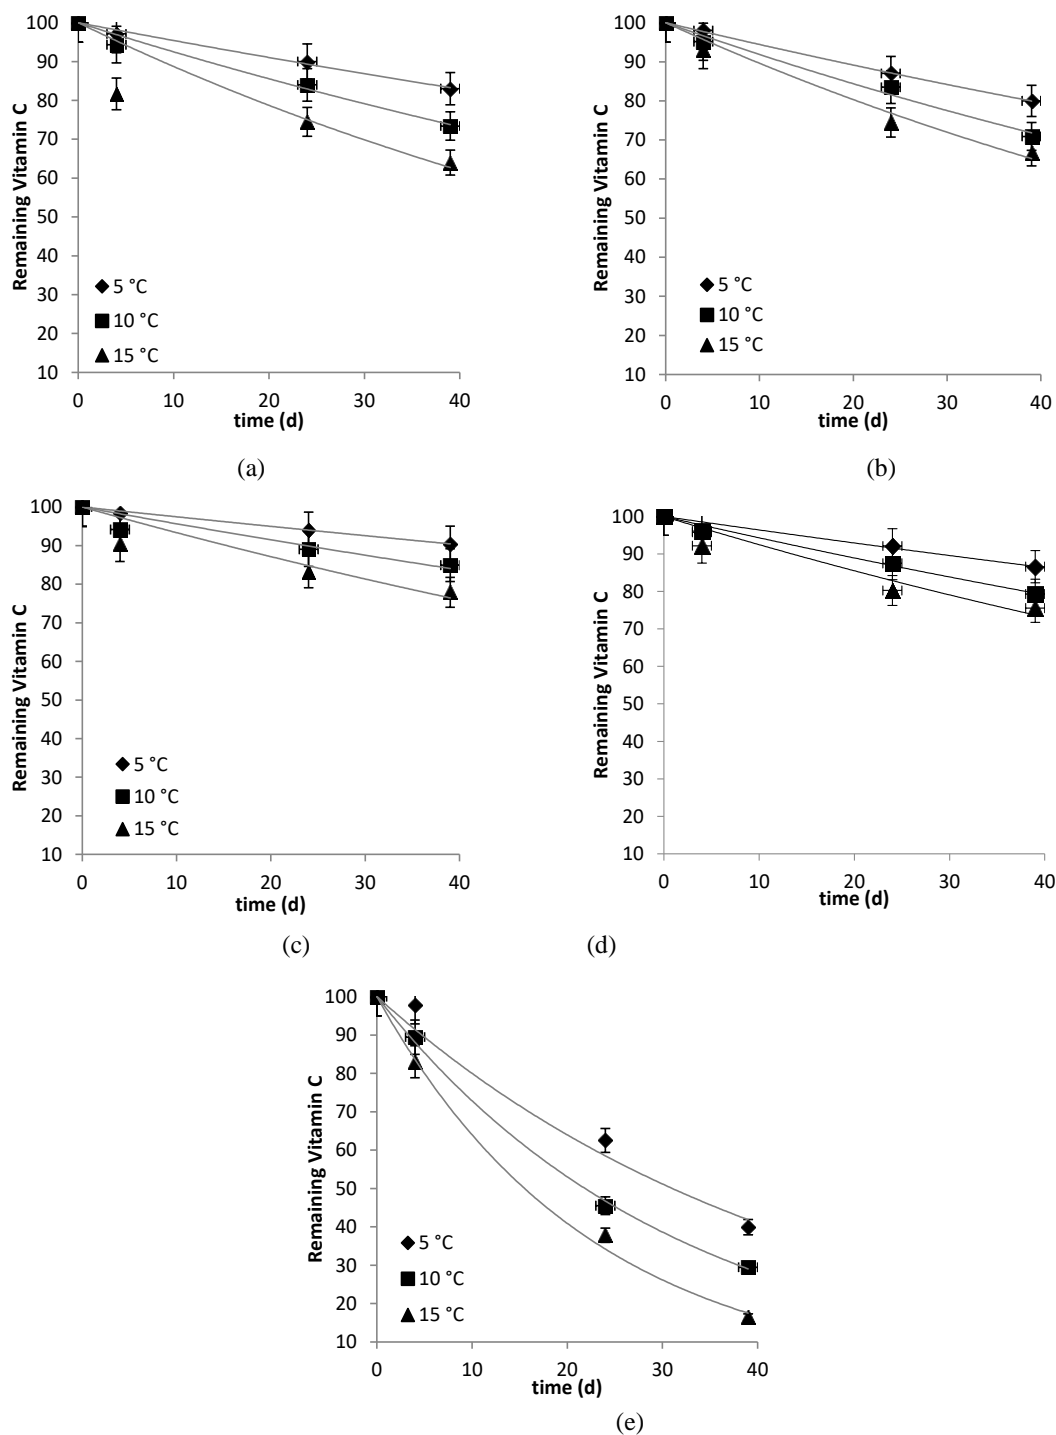

**Figure S1** Vitamin C (remaining vitamin C concentration) versus time  $t$  (days) for HP processed avocado beverage samples stored at temperatures ( $T$ ) 5 (◆), 10 (■) and 15 °C (▲). Processing (pressure-temperature-time) conditions: (a) 600 MPa-25 °C-10 min, (b) 600 MPa-35 °C-10 min, (c) 750 MPa-25 °C-5 min, (d) 750 MPa-35 °C-5 min and (e) atmospheric-90 °C-5 min (thermally processed).

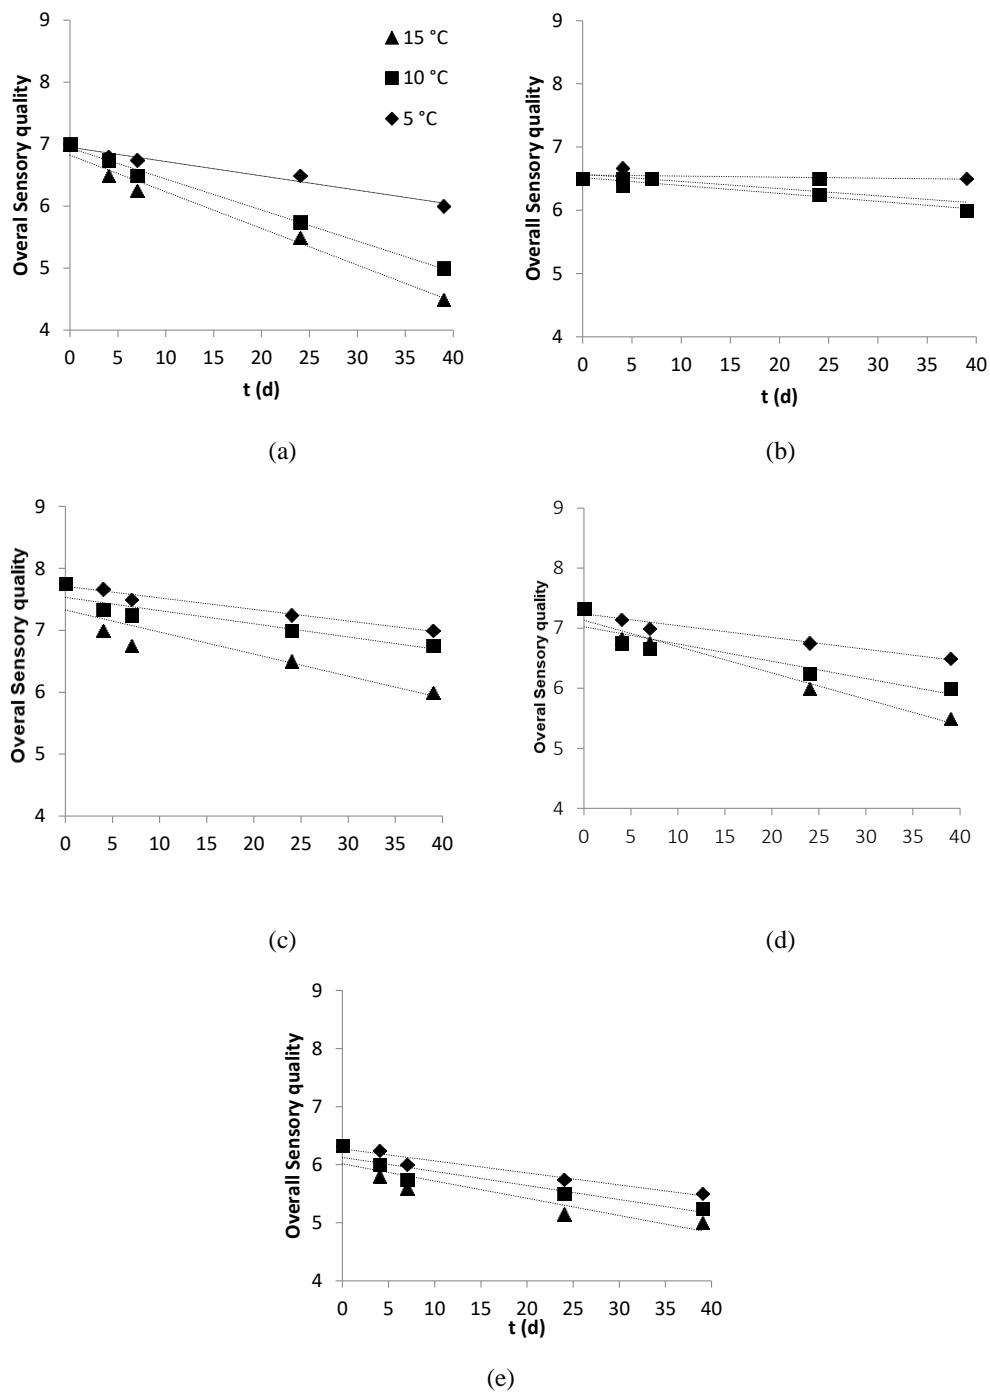

**Figure S2** Overall sensory quality scores (scale 1-9) versus time  $t$  (days) for HP processed avocado beverage samples stored at temperatures (T) 5 (◆), 10 (■) and 15 °C (▲). Processing (pressure-temperature-time) conditions: (a) 600 MPa-25 °C-10 min, (b) 600 MPa-35 °C-10 min, (c) 750 MPa-25 °C-5 min, (d) 750 MPa-35 °C-5 min and (e) atmospheric-90 °C-5 min (thermally processed).

**Table S1** Estimated kinetic parameters,  $k_{col}$  (days<sup>-1</sup>) and activation energy  $E_{a,col}$  (kJ/mol) values for vitamin C loss of avocado puree-based beverages stored at temperatures 5, 10 and 15 °C. Samples: 600 MPa-25 °C-10 min, 600 MPa-35 °C-10 min, 750 MPa-25 °C-5 min, and atmospheric-90 °C-5 min (thermally processed).

| HP<br>processed<br>avocado-<br>based<br>beverage | Storage temperature |                              |                |                  |                              |                |                  |                              |                |
|--------------------------------------------------|---------------------|------------------------------|----------------|------------------|------------------------------|----------------|------------------|------------------------------|----------------|
|                                                  | 5 °C                |                              |                | 10 °C            |                              |                | 15 °C            |                              |                |
|                                                  | $\Delta E_{max}$    | $k_{col}$ (d <sup>-1</sup> ) | R <sup>2</sup> | $\Delta E_{max}$ | $k_{col}$ (d <sup>-1</sup> ) | R <sup>2</sup> | $\Delta E_{max}$ | $k_{col}$ (d <sup>-1</sup> ) | R <sup>2</sup> |
| 600 MPa-25 °C-10 min                             | 6.176±0.803         | 6.818±2.909                  | 0.951          | 5.530±0.667      | 4.134±1.911                  | 0.944          | 4.257±0.247      | 0.033±0.313                  | 0.979          |
| 600 MPa-35 °C-10 min                             | 1.931±0.069         | 2.097±0.379                  | 0.993          | 2.199±0.473      | 0.752±1.541                  | 0.774          | 2.878±0.629      | 3.939±3.359                  | 0.837          |
| 750 MPa-25 °C-5 min                              | 5.346±0.585         | 3.134±1.454                  | 0.945          | 6.092±0.316      | 4.255±0.839                  | 0.989          | 5.523±0.418      | 1.406±0.667                  | 0.967          |
| 750 MPa-35 °C-5 min                              | 2.455±0.125         | 0.843±0.376                  | 0.984          | 3.222±0.421      | 4.593±2.222                  | 0.935          | 4.496±0.051      | 0.499±0.074                  | 0.999          |
| atmospheric-90 °C-5 min                          | 3.838±0.895         | 10.375±6.966                 | 0.902          | 5.261±0.573      | 8.158±2.761                  | 0.973          | 6.795±0.631      | 8.839±2.489                  | 0.981          |
